# Supplementary material for: Adenosine detection in serum using a surface plasmon resonance biosensor with molecularly imprinted polymers incorporating modified thymidine monomers
Source: Royal Society of Chemistry journal article supplement (doi:10.1039/d4lp00059e), 2024-01-01
Supplement: d4lp00059e1.pdf [file d4lp00059e1.pdf]

## Adenosine detection using molecularly imprinted polymer biosensor with incorporated modified thymidine monomers

Molly I. Wild, Mark V. Sullivan, Chester Blackburn, Nicholas W. Turner

Department of Chemistry, University of Sheffield, Dainton Building, 13 Brook Hill, Sheffield, S3 7HF, UK

Email: n.w.turner@sheffield.ac.uk

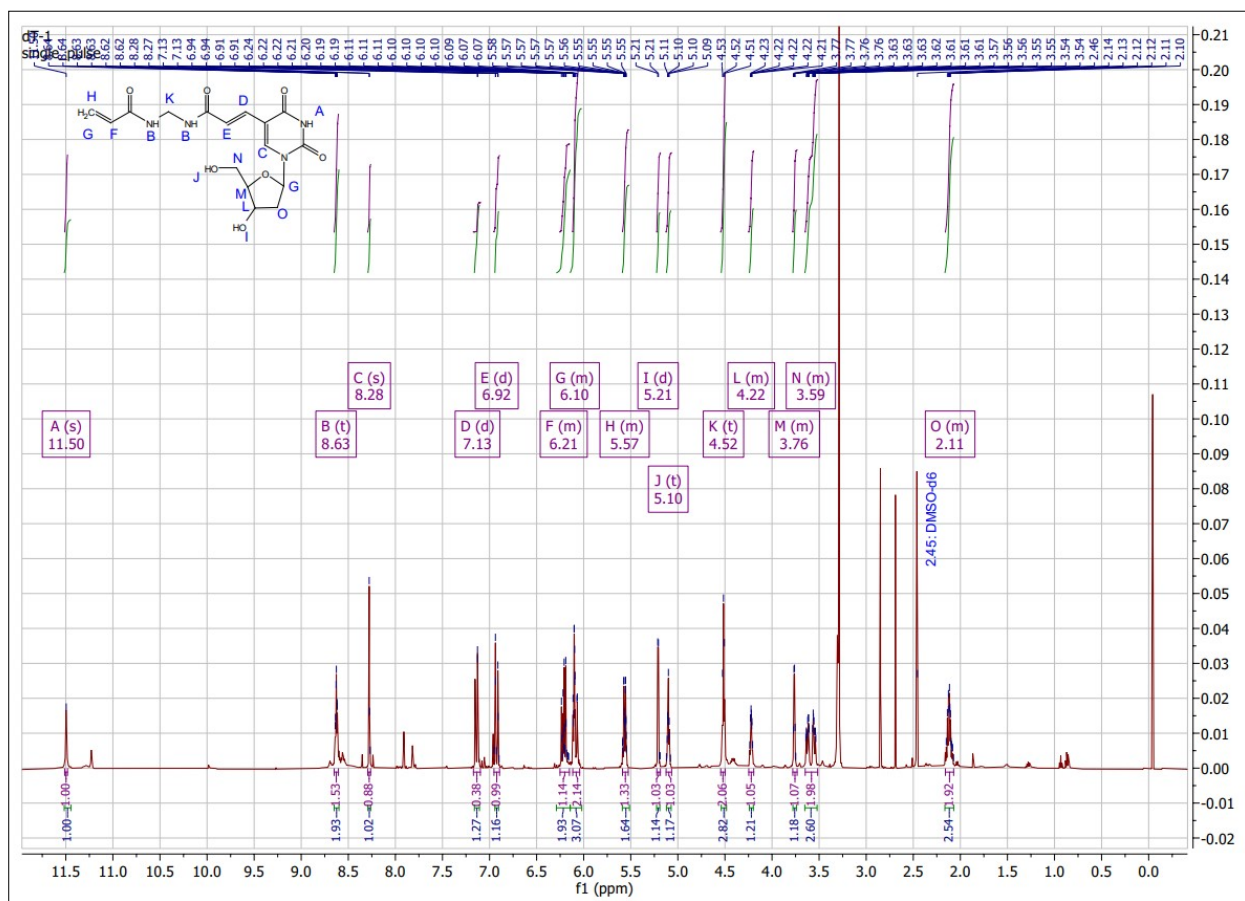

Figure S1: NMR spectra for acrylamide-dT

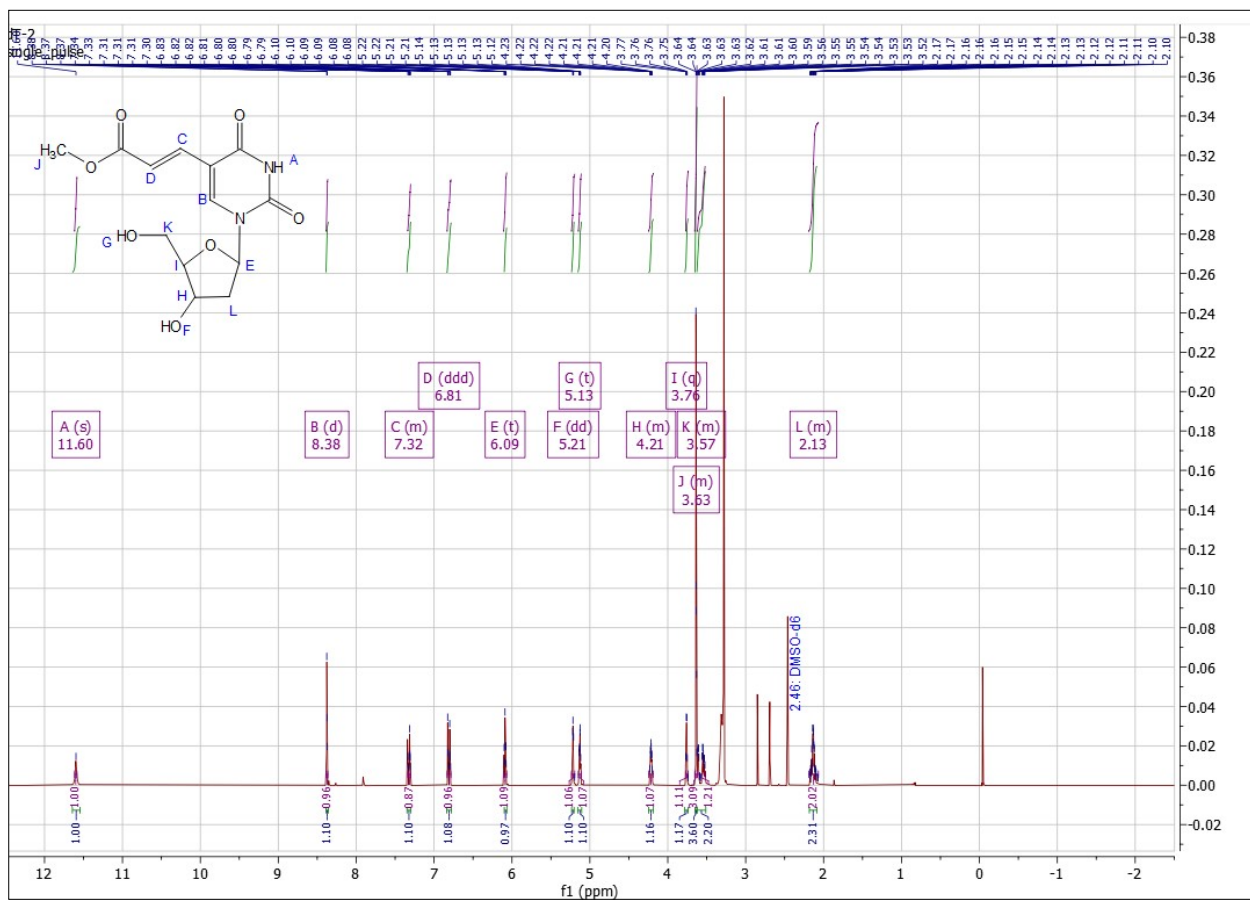

Figure S2: NMR spectra for carboxy-dT

**DLS data:**

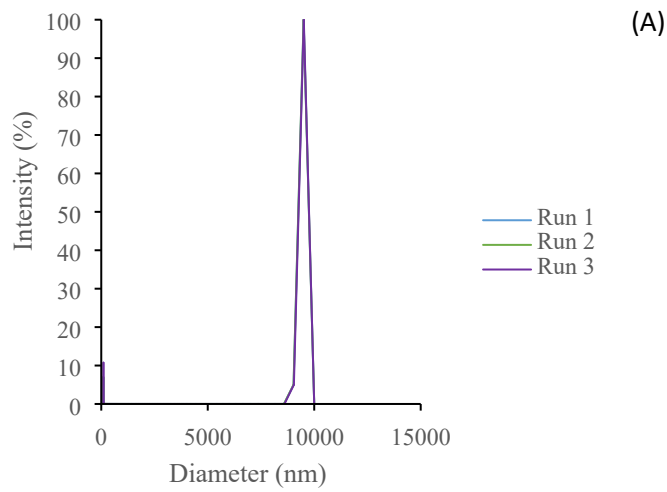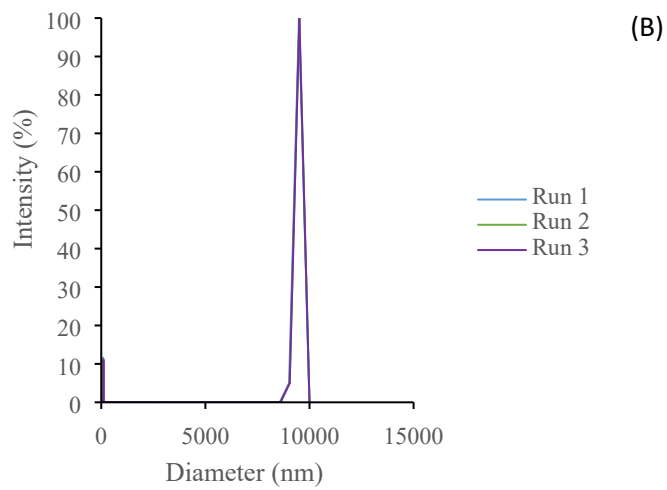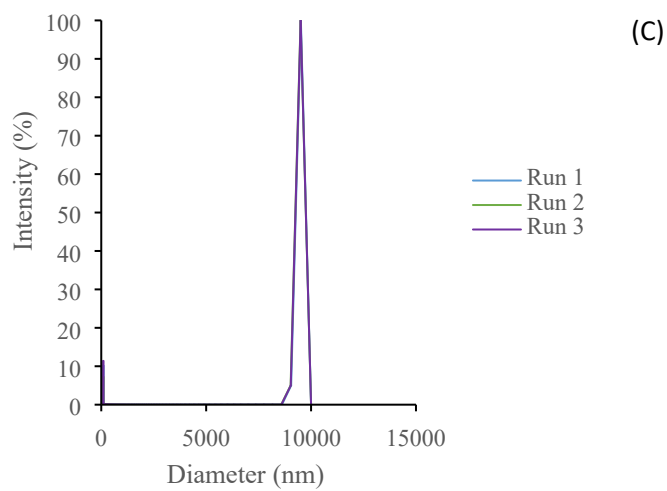

**Figure S3:** Particle size distribution for plain nanoMIP (A), acrylamide-dT nanoMIP (B) and carboxy-dT nanoMIP (C) synthesised using GA to leave the sugar exposed.

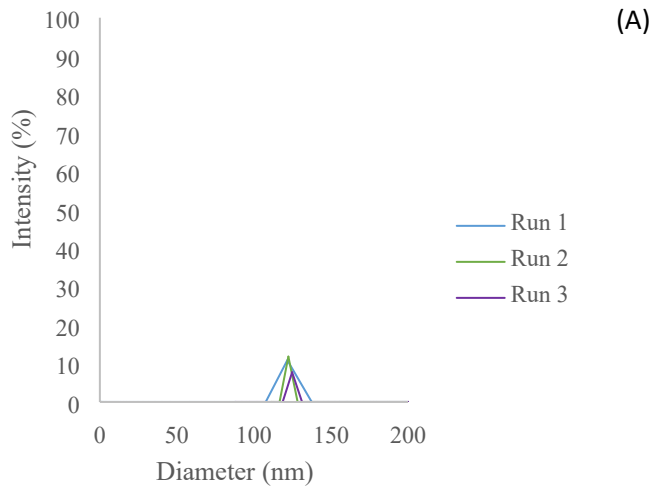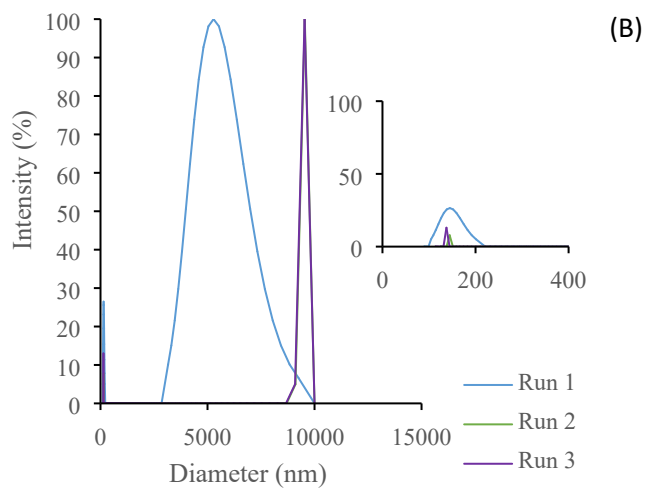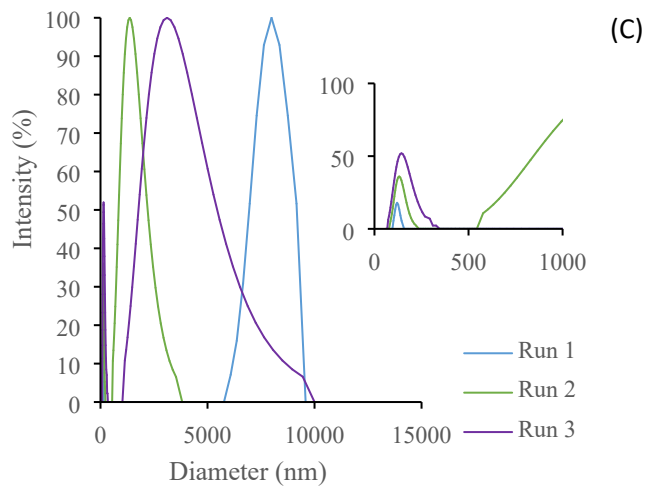

**Figure S4:** Particle size distribution for plain nanoMIP (A), acrylamide-dT nanoMIP (B) and carboxy-dT nanoMIP (C) synthesised using EDC/NHS chemistry to leave the base exposed.

|                | Selectivity Factor |                       |                    |
|----------------|--------------------|-----------------------|--------------------|
|                | NanoMIP            | Acrylamide-dT nanoMIP | Carboxy-dT nanoMIP |
| Adenosine      | N/A                | N/A                   | N/A                |
| Deoxycytidine  | 18.8               | 214.9                 | 1639.8             |
| Deoxyguanosine | 125.7              | 947.5                 | 796.2              |
| Thymidine      | 9.5                | 2074.8                | 1592.4             |

**Table S1:** Calculated selectivity factors of GA

|                | Selectivity Factor |                       |                    |
|----------------|--------------------|-----------------------|--------------------|
|                | NanoMIP            | Acrylamide-dT nanoMIP | Carboxy-dT nanoMIP |
| Adenosine      | N/A                | N/A                   | N/A                |
| Deoxycytidine  | 12.94              | 0.48                  | 7.03               |
| Deoxyguanosine | 2.23               | 1.44                  | 32.99              |
| Thymidine      | 16.09              | 0.06                  | 12.98              |

**Table S2:** calculated selectivity factors of EDC/NHS

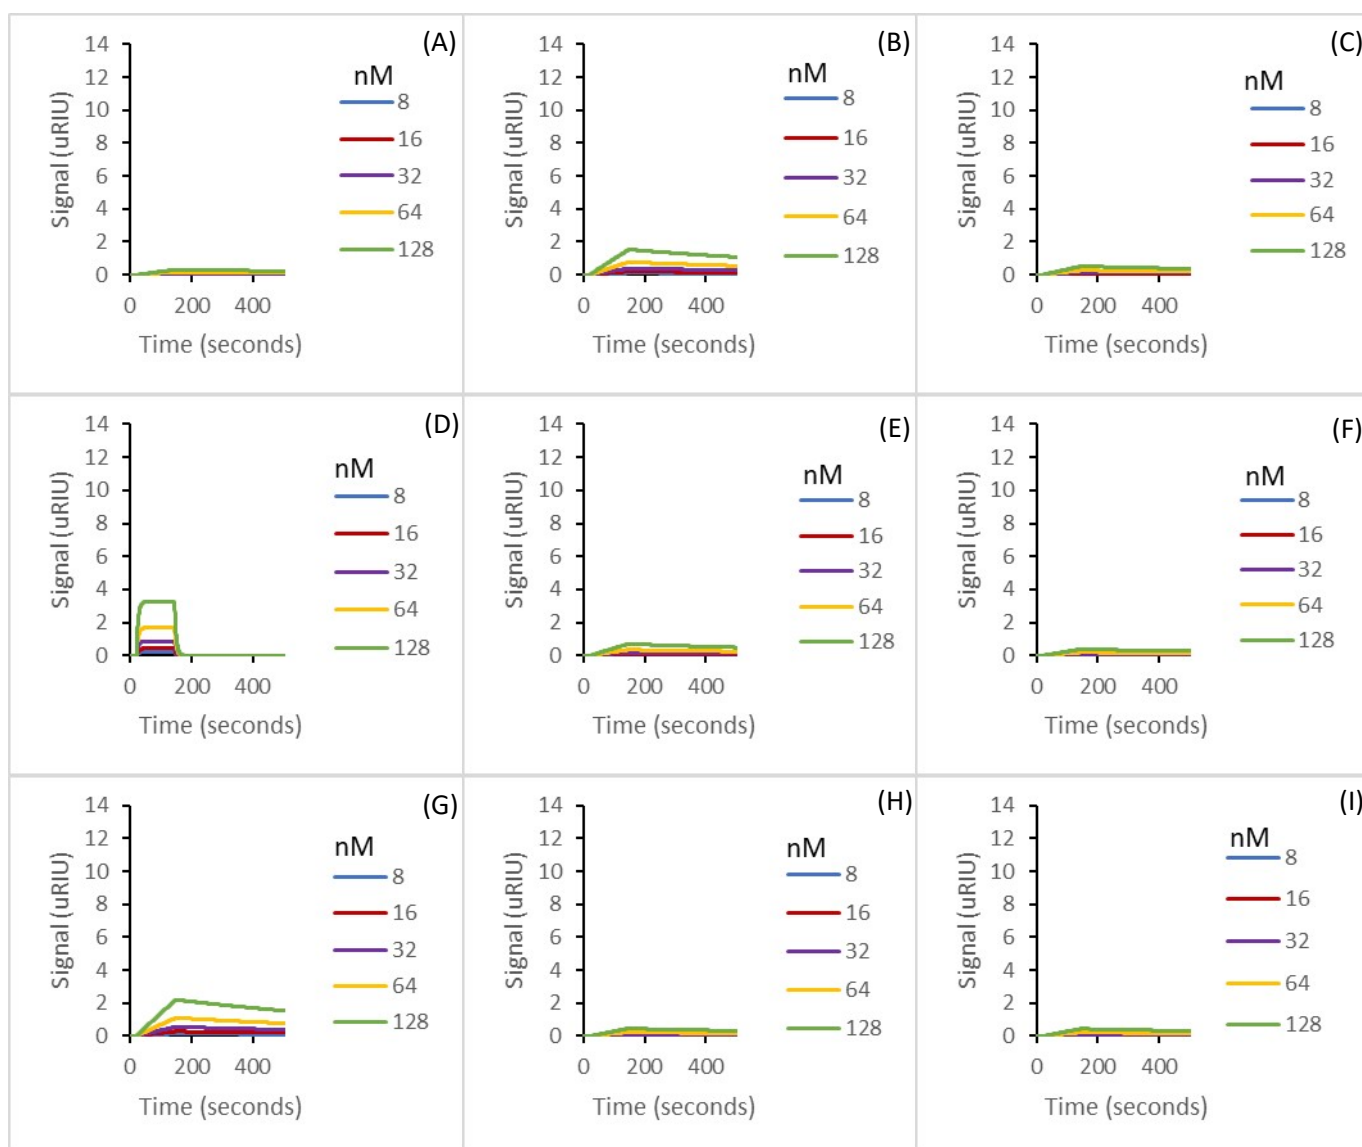

**Figure S5:** SPR curves illustrating the selectivity of the nanoMIPs synthesised using the GA method; deoxycytidine binding to plain nanoMIP (A), deoxyguanosine binding to plain nanoMIP (B), thymidine binding to plain nanoMIP (C), deoxycytidine binding to acrylamide-dT nanoMIP (D), deoxyguanosine binding to acrylamide-dT nanoMIP (E), thymidine binding to acrylamide-dT nanoMIP (F), deoxycytidine binding to carboxy-dT nanoMIP (H), deoxyguanosine binding to carboxy-dT (I), thymidine binding to carboxy-dT nanoMIP (J) in PBST.

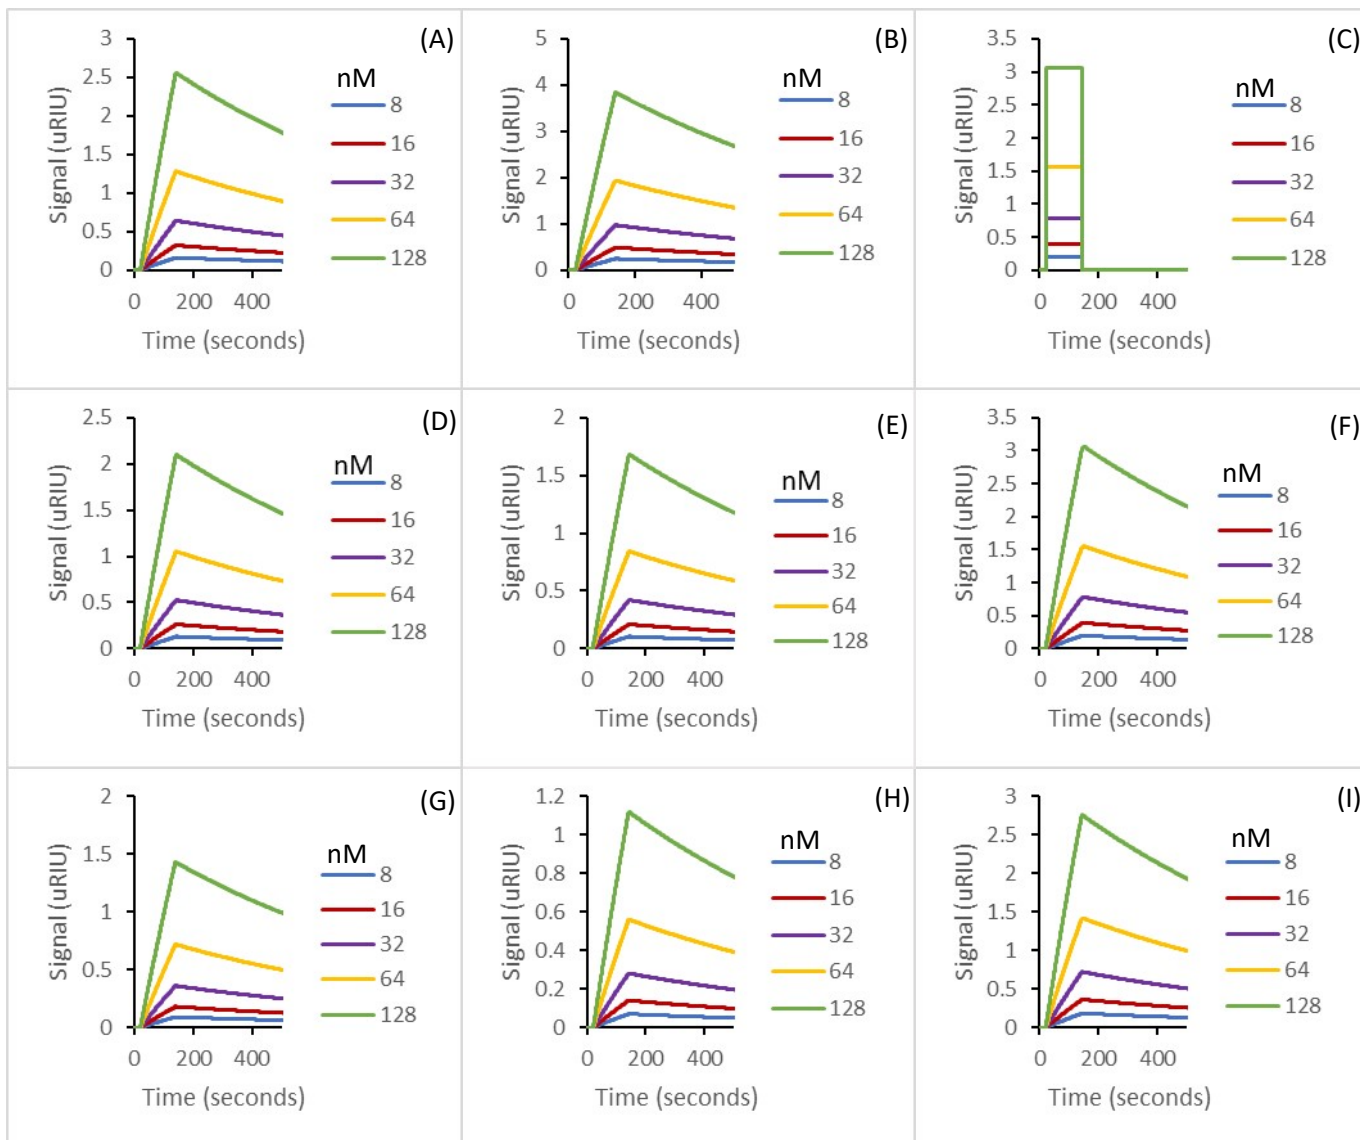

**Figure S6:** SPR curves illustrating the selectivity of the nanoMIPs synthesised using the EDC/NHS method; deoxycytidine binding to plain nanoMIP (A), deoxyguanosine binding to plain nanoMIP (B), thymidine binding to plain nanoMIP (C), deoxycytidine binding to acrylamide-dT nanoMIP (D), deoxyguanosine binding to acrylamide-dT nanoMIP (E), thymidine binding to acrylamide-dT nanoMIP (F), deoxycytidine binding to carboxy-dT nanoMIP (H), deoxyguanosine binding to carboxy-dT (I), thymidine binding to carboxy-dT nanoMIP (J) in PBST.

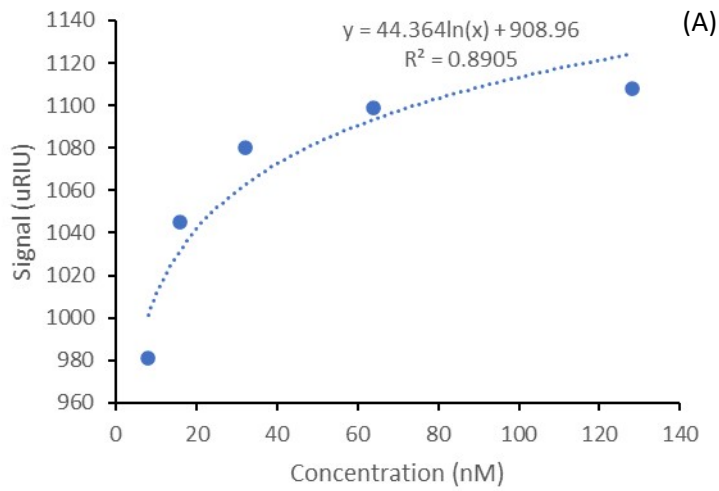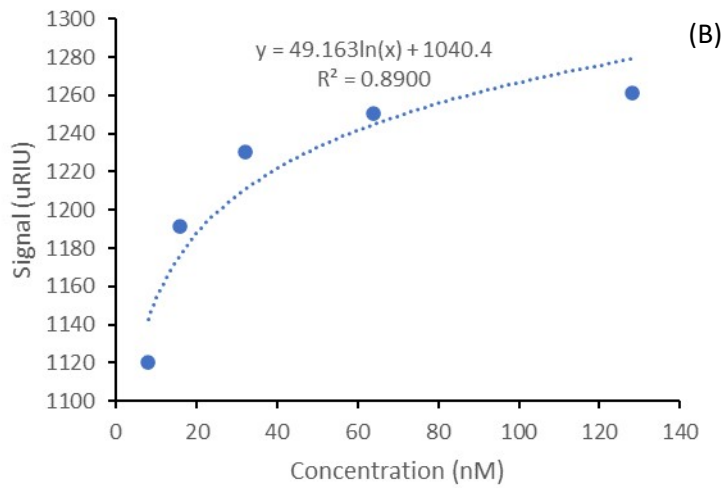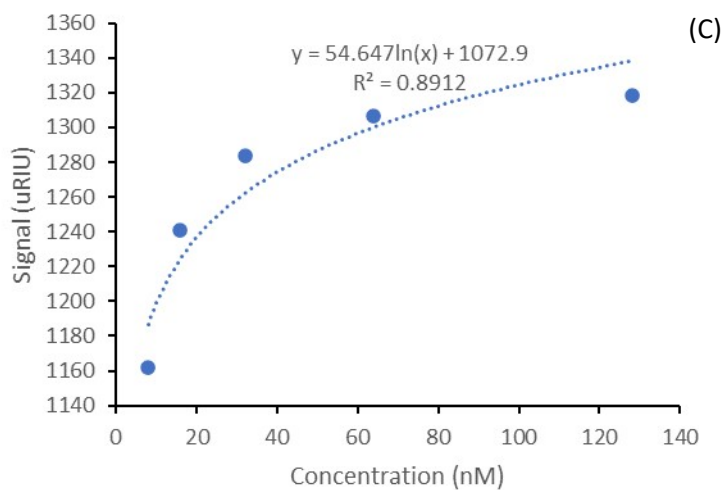

**Figure S7:** Illustrative calibration curves showing the relative signal against concentration for adenosine in fetal bovine serum: GA method plain nanoMIP (A), GA method acrylamide-dT nanoMIP (B) and GA method carboxy-dT nanoMIP (C).



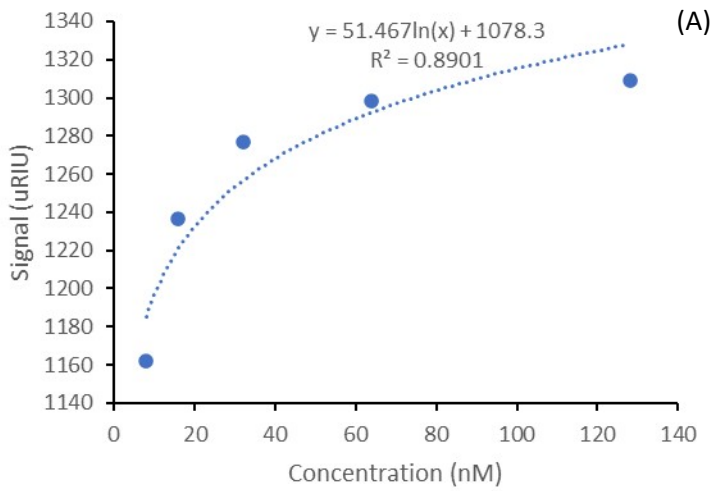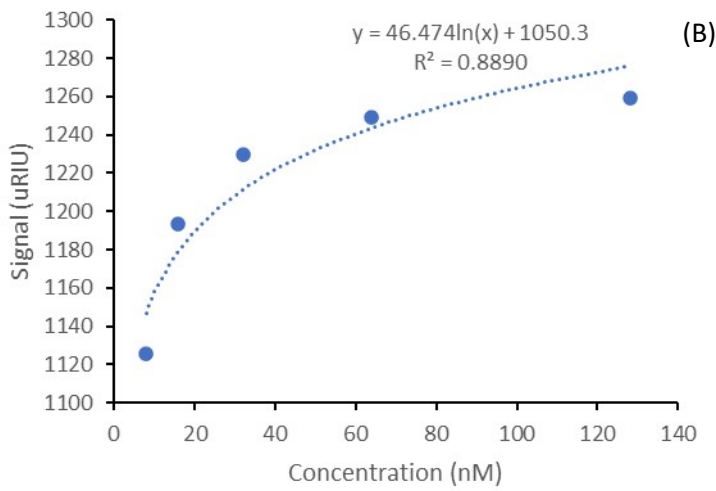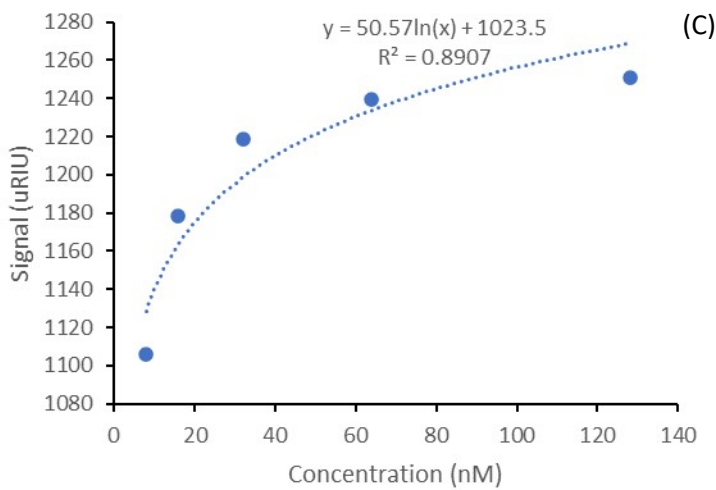

**Figure S8:** Illustrative calibration curves showing the relative signal against concentration for adenosine in fetal bovine serum: EDC/NHS method plain nanoMIP (A), EDC/NHS method acrylamide-dT nanoMIP (B) and EDC/NHS method carboxy-dT nanoMIP (C).
